# Supplementary material for: Development of a decision analytical framework to prioritise operating room capacity: lessons learnt from an empirical example on delayed elective surgeries during the COVID-19 pandemic in a hospital in the Netherlands
Source: HighWire-hosted journal article supplement (doi:10.1136/bmjopen-2021-054110), 2022-04-01
Supplement: bmjopen-2021-054110supp001_data_supplement.pdf [file bmjopen-2021-054110supp001_data_supplement.pdf]

## CHEERS 2022 Checklist

| <b>Title</b>                         |   |                                                                                                                                 |                                                                                                                                               |
|--------------------------------------|---|---------------------------------------------------------------------------------------------------------------------------------|-----------------------------------------------------------------------------------------------------------------------------------------------|
| Title                                | 1 | Identify the study as an economic evaluation and specify the interventions being compared.                                      | Title, Page 1, line 1 - 3. The study is identified as decision analytical modelling study                                                     |
| <b>Abstract</b>                      |   |                                                                                                                                 |                                                                                                                                               |
| Abstract                             | 2 | Provide a structured summary that highlights context, key methods, results, and alternative analyses.                           | Abstract, Page 3, line 39 - 61. The abstract is structured and includes objective, design, setting, outcome measures, results and conclusions |
| <b>Introduction</b>                  |   |                                                                                                                                 |                                                                                                                                               |
| Background and objectives            | 3 | Give the context for the study, the study question, and its practical relevance for decision making in policy or practice.      | Introduction, Page 5, line 83 - 113.                                                                                                          |
| Methods                              |   |                                                                                                                                 |                                                                                                                                               |
| <b>Health economic analysis plan</b> | 4 | <b>Indicate whether a health economic analysis plan was developed and where available.</b>                                      | <b>n.a.</b>                                                                                                                                   |
| Study population                     | 5 | Describe characteristics of the study population (such as age range, demographics, socioeconomic, or clinical characteristics). | Methods, Selected elective procedures paragraph, Page 7 - 8, line 126-141.                                                                    |
| Setting and location                 | 6 | Provide relevant contextual information that may influence findings.                                                            | Methods, Selected elective procedures and empirical example paragraph, Page 7 - 8, line 126 - 141 and page 11, line 216 - 223.                |
| Comparators                          | 7 | Describe the interventions or strategies being compared and why chosen.                                                         | Methods, Selected elective procedures paragraph, Page 7 - 8, line 126-141.                                                                    |
| Perspective                          | 8 | State the perspective(s) adopted by the study and why chosen.                                                                   | Methods, Costs paragraph, Page 9 - 10, line 175 - 186.                                                                                        |

*(continued)*

|                                                  |    |                                                                                                                                                 |                                                                                                          |
|--------------------------------------------------|----|-------------------------------------------------------------------------------------------------------------------------------------------------|----------------------------------------------------------------------------------------------------------|
| Time horizon                                     | 9  | State the time horizon for the study and why appropriate.                                                                                       | Methods, Costs paragraph, Page 9 - 10, line 175 - 186.                                                   |
| Discount rate                                    | 10 | Report the discount rate(s) and reason chosen.                                                                                                  | n.a                                                                                                      |
| Selection of outcomes                            | 11 | Describe what outcomes were used as the measure(s) of benefit(s) and harm(s).                                                                   | Methods, Quality of life, costs and analysis paragraphs, Page 9 - 11, line 160 - 186 and line 194 - 215. |
| Measurement of outcomes                          | 12 | Describe how outcomes used to capture benefit(s) and harm(s) were measured.                                                                     | Methods, Quality of life, costs and analysis paragraphs, Page 9 - 11, line 160 - 186 and line 194 - 215. |
| Valuation of outcomes                            | 13 | Describe the population and methods used to measure and value outcomes.                                                                         | Methods, Data acquisition and validation paragraph and appendices, Page 8, line 144 - 158.               |
| Measurement and valuation of resources and costs | 14 | Describe how costs were valued.                                                                                                                 | Methods, Costs paragraph, Page 9 - 10, line 175 - 186.                                                   |
| Currency, price date, and conversion             | 15 | Report the dates of the estimated resource quantities and unit costs, plus the currency and year of conversion.                                 | Methods, Costs paragraph and online tool, Page 9 - 12, line 175 - 186 and line 224 - 236.                |
| Rationale and description of model               | 16 | If modelling is used, describe in detail and why used. Report if the model is publicly available and where it can be accessed.                  | Methods, Entire methods section, Page 7, line 115 - 124.                                                 |
| Analytics and assumptions                        | 17 | Describe any methods for analysing or statistically transforming data, any extrapolation methods, and approaches for validating any model used. | Methods, Entire methods section, Page 10 - 11, line 194 - 215.                                           |
| Characterising heterogeneity                     | 18 | Describe any methods used for estimating how the results of the study vary for subgroups.                                                       | n.a                                                                                                      |

*(continued)*

|                                                                       |    |                                                                                                                                                                               |                                                                                  |
|-----------------------------------------------------------------------|----|-------------------------------------------------------------------------------------------------------------------------------------------------------------------------------|----------------------------------------------------------------------------------|
| Characterising distributional effects                                 | 19 | Describe how impacts are distributed across different individuals or adjustments made to reflect priority populations.                                                        | n.a                                                                              |
| Characterising uncertainty                                            | 20 | Describe methods to characterise any sources of uncertainty in the analysis.                                                                                                  | n.a                                                                              |
| Approach to engagement with patients and others affected by the study | 21 | Describe any approaches to engage patients or service recipients, the general public, communities, or stakeholders (such as clinicians or payers) in the design of the study. | Methods, Patient and Public Involvement, Page 12, line 237 - 238                 |
| <b>Results</b>                                                        |    |                                                                                                                                                                               |                                                                                  |
| Study parameters                                                      | 22 | Report all analytic inputs (such as values, ranges, references) including uncertainty or distributional assumptions.                                                          | Results, Entire results section, Page 13 - 16, line 239 - 289                    |
| Summary of main results                                               | 23 | Report the mean values for the main categories of costs and outcomes of interest and summarise them in the most appropriate overall measure.                                  | Results, First 4 paragraphs of the results section, Page 13 - 16, line 239 - 274 |
| Effect of uncertainty                                                 | 24 | Describe how uncertainty about analytic judgments, inputs, or projections affect findings. Report the effect of choice of discount rate and time horizon, if applicable.      | n.a                                                                              |
| Effect of engagement with patients and others affected by the study   | 25 | Report on any difference patient/service recipient, general public, community, or stakeholder involvement made to the approach or findings of the study                       | n.a                                                                              |
| Discussion                                                            |    |                                                                                                                                                                               |                                                                                  |

*(continued)*

|                                                                      |    |                                                                                                                                            |                                                                             |
|----------------------------------------------------------------------|----|--------------------------------------------------------------------------------------------------------------------------------------------|-----------------------------------------------------------------------------|
| Study findings, limitations, generalisability, and current knowledge | 26 | Report key findings, limitations, ethical or equity considerations not captured, and how these could affect patients, policy, or practice. | Discussion, Entire discussion section, Page 17 - 21, line 290 - 400         |
| Other relevant information<br>Source of funding                      | 27 | Describe how the study was funded and any role of the funder in the identification, design, conduct, and reporting of the analysis         | Declarations, Role of the funding source statement, Page 24, line 457 - 463 |
| Conflicts of interest                                                | 28 | Report authors conflicts of interest according to journal or International Committee of Medical Journal Editors requirements.              | Declarations, Competing interests statement, Page 23, line 433 - 438        |

*From:* Husereau D, Drummond M, Augustovski F, et al. Consolidated Health Economic Evaluation Reporting Standards 2022 (CHEERS 2022) Explanation and Elaboration: A Report of the ISPOR CHEERS II Good Practices Task Force. *Value Health* 2022;25. doi:10.1016/j.jval.2021.10.008

**Supplement S2: Search strategy for model data****OR Time / Length of stay after OR**

- Disease
- Surgery type
- Length of stay / hospital stay
- Optional: Netherlands, Europe, UK, Germany

Pubmed:

1. "<Disease>" AND "<Surgery type>" FILTER RCT
2. "<Disease>" AND "<Surgery type>" AND ("length of stay" OR "hospital stay")
3. Patient information folder

**Utility scores**

- Utility score / EQ5D /Quality of Life
- Disease
- Surgery type
- Conservative treatment / conservative care / watchful waiting
- Optional: Netherlands, Europe, UK, Germany

Pubmed:

"Utility score" OR "EQ5D" OR "Quality of Life" AND

1. "<disease name>" OR "<surgery type>"
2. "Conservative treatment" OR "Conservative care" OR "Watchful waiting"

**Costing data**

- Costs / Resource use / Resources / Resource utilisation / Healthcare utilization
- Disease
- Surgery type
- Conservative treatment / conservative care/watchful waiting
- Optional: Netherlands, Europe, UK, Germany

Pubmed:

"Costs" OR "Resource use" OR "Resources" OR "Resource utilization" OR "Healthcare utilization" AND

1. "<disease name>" OR "<surgery type>"
2. "Conservative treatment" OR "Conservative care" OR "Watchful waiting"

**Supplement S3.** Impact of surgical delay for the Netherlands

| Surgical procedure                            | Average number of surgeries per week | Costs associated with delay |               |               |               |               | Net monetary loss per week |                 |                 |                 |                 |
|-----------------------------------------------|--------------------------------------|-----------------------------|---------------|---------------|---------------|---------------|----------------------------|-----------------|-----------------|-----------------|-----------------|
|                                               |                                      | % of surgeries delayed      |               |               |               |               | % of surgeries delayed     |                 |                 |                 |                 |
|                                               |                                      | 10%                         | 20%           | 30%           | 40%           | 50%           | 10%                        | 20%             | 30%             | 40%             | 50%             |
| Inguinal hernia repair                        | 535.9                                | €0                          | €0            | €0            | €0            | €0            | €-2061                     | €-4122          | €-6183          | €-8244          | €-10305         |
| Laparoscopic sleeve gastrectomy               | 1.5                                  | €5                          | €9            | €14           | €18           | €23           | €-13                       | €-25            | €-38            | €-51            | €-63            |
| laparoscopic Roux-and-Y gastric bypass        | 2.7                                  | €8                          | €17           | €25           | €34           | €42           | €-21                       | €-42            | €-63            | €-84            | €-105           |
| Partial colectomy – Non-acute Crohn’s disease | 25.5                                 | 43                          | €86           | €128          | €171          | €214          | €-239                      | €-478           | €-718           | €-957           | €-1196          |
| Partial colectomy – Ulcerative colitis        | 9.8                                  | €16                         | €31           | €47           | €62           | €78           | €-61                       | €-121           | €-182           | €-243           | €-303           |
| Sphincteroplasty                              | 0.8                                  | n.a.                        | n.a.          | n.a.          | n.a.          | n.a.          | n.a.                       | n.a.            | n.a.            | n.a.            | n.a.            |
| Total hip replacement                         | 574.3                                | €553                        | €1106         | €1660         | €2213         | €2766         | €-6539                     | €-13078         | €-19617         | €-26156         | €-32695         |
| Total knee replacement                        | 552.5                                | €532                        | €1065         | €1597         | €2129         | €2661         | €-5207                     | €-10415         | €-15622         | €-20830         | €-26037         |
| Total shoulder replacement                    | 56.9                                 | n.a.                        | n.a.          | n.a.          | n.a.          | n.a.          | n.a.                       | n.a.            | n.a.            | n.a.            | n.a.            |
| Arthroscopic partial meniscectomy             | 406.8                                | €-65                        | €-131         | €-196         | €-262         | €-327         | €-731                      | €-1462          | €-2193          | €-2923          | €-3654          |
| Septoplasty                                   | 181.2                                | €-14                        | €-27          | €-41          | €-55          | €-69          | €-404                      | €-809           | €-1213          | €-1618          | €-2022          |
| Male sling procedure                          | 2.6                                  | n.a.                        | n.a.          | n.a.          | n.a.          | n.a.          | n.a.                       | n.a.            | n.a.            | n.a.            | n.a.            |
| Tension-free vaginal tape procedure           | 66.5                                 | n.a.                        | n.a.          | n.a.          | n.a.          | n.a.          | n.a.                       | n.a.            | n.a.            | n.a.            | n.a.            |
| <b>Total per week*</b>                        | <b>2290</b>                          | <b>€1,077</b>               | <b>€2,155</b> | <b>€3,232</b> | <b>€4,310</b> | <b>€5,388</b> | <b>-€15,764</b>            | <b>-€31,529</b> | <b>-€47,293</b> | <b>-€63,058</b> | <b>-€78,823</b> |

\*only including procedures with available cost and NML data  
n.a. not available, NML: net monetary loss

**Supplement S4. Waiting lists and net monetary losses of a large regional hospital in The Netherlands on 30 June 2020, 2019 and 2018.**

| Surgical procedure                            | 2018                         |              |                             |                    | 2019                         |              |                             |                    | 2020                         |              |                             |                    |
|-----------------------------------------------|------------------------------|--------------|-----------------------------|--------------------|------------------------------|--------------|-----------------------------|--------------------|------------------------------|--------------|-----------------------------|--------------------|
|                                               | Patients waiting for surgery | Waiting time | Costs associated with delay | Net monetary loss  | Patients waiting for surgery | Waiting time | Costs associated with delay | Net monetary loss  | Patients waiting for surgery | Waiting time | Costs associated with delay | Net monetary loss  |
| Inguinal hernia repair                        | 25                           | 4            | € 0                         | -€ 3,441           | 40                           | 4            | € 0                         | -€ 6,851           | 36                           | 12           | € 0                         | -€ 16,397          |
| Laparoscopic sleeve gastrectomy               | 11                           | 6            | € 1,943                     | -€ 5,316           | 3                            | 5            | € 491                       | -€ 1,342           | 19                           | 10           | € 5,682                     | -€ 15,543          |
| laparoscopic Roux-and-Y gastric bypass        | 13                           | 5            | € 2,046                     | -€ 5,095           | 7                            | 6            | € 1,262                     | -€ 3,143           | 30                           | 12           | € 10,798                    | -€ 26,890          |
| Partial colectomy – Non-acute Crohn’s disease | 0                            | 1            | € 0                         | € 0                | 0                            | 3            | € 0                         | € 0                | 0                            | 6            | € 0                         | € 0                |
| Partial colectomy – Ulcerative colitis        | 3                            | 2            | € 100                       | -€ 387             | 1                            | 2            | € 36                        | -€ 140             | 1                            | 2            | € 34                        | -€ 131             |
| Sphincteroplasty                              | 0                            | 3            | n.a.                        | n.a.               | 1                            | 6            | n.a.                        | n.a.               | 1                            | 0            | n.a.                        | n.a.               |
| Total hip replacement                         | 57                           | 7            | € 4,153                     | -€ 47,285          | 66                           | 9            | € 6,016                     | -€ 68,489          | 202                          | 17           | € 33,501                    | -€ 381,404         |
| Total knee replacement                        | 71                           | 8            | € 5,836                     | -€ 55,216          | 71                           | 11           | € 7,605                     | -€ 71,956          | 193                          | 21           | € 39,770                    | -€ 376,299         |
| Total shoulder replacement                    | 4                            | 6            | n.a.                        | n.a.               | 3                            | 8            | n.a.                        | n.a.               | 11                           | 14           | n.a.                        | n.a.               |
| Arthroscopic partial meniscectomy             | 17                           | 4            | -€ 112                      | -€ 1,227           | 19                           | 5            | -€ 139                      | -€ 1,527           | 15                           | 13           | -€ 317                      | -€ 3,475           |
| Septoplasty                                   | 40                           | 7            | -€ 283                      | -€ 6,258           | 72                           | 12           | -€ 870                      | -€ 19,217          | 103                          | 23           | -€ 2,417                    | -€ 53,365          |
| Male sling procedure                          | 12                           | 7            | n.a.                        | n.a.               | 6                            | 13           | n.a.                        | n.a.               | 11                           | 14           | n.a.                        | n.a.               |
| Tension-free vaginal tape procedure           | 4                            | 14           | n.a.                        | n.a.               | 2                            | 32           | n.a.                        | n.a.               | 2                            | 17           | n.a.                        | n.a.               |
| <b>Total</b>                                  | <b>257</b>                   |              | <b>€ 13,682*</b>            | <b>-€ 124,224*</b> | <b>291</b>                   |              | <b>€ 14,399*</b>            | <b>-€ 172,664*</b> | <b>624</b>                   |              | <b>€ 87,049*</b>            | <b>-€ 873,504*</b> |

\* \*only including procedures with available cost and NML data  
n.a. not available, NML: net monetary loss
